# Supplementary material for: Endogenous oxytocin exerts anti-nociceptive and anti-inflammatory effects in rats
Source: PubMed Central journal article supplement (PMC9445084; doi:10.1038/s42003-022-03879-8), 2022-09-05
Supplement: 42003_2022_3879_MOESM3_ESM.pdf [file 42003_2022_3879_MOESM3_ESM.pdf]

## Reporting Summary

Nature Portfolio wishes to improve the reproducibility of the work that we publish. This form provides structure for consistency and transparency in reporting. For further information on Nature Portfolio policies, see our [Editorial Policies](#) and the [Editorial Policy Checklist](#).

### Statistics

For all statistical analyses, confirm that the following items are present in the figure legend, table legend, main text, or Methods section.

n/a Confirmed

- The exact sample size ( $n$ ) for each experimental group/condition, given as a discrete number and unit of measurement
- A statement on whether measurements were taken from distinct samples or whether the same sample was measured repeatedly
- The statistical test(s) used AND whether they are one- or two-sided  
*Only common tests should be described solely by name; describe more complex techniques in the Methods section.*
- A description of all covariates tested
- A description of any assumptions or corrections, such as tests of normality and adjustment for multiple comparisons
- A full description of the statistical parameters including central tendency (e.g. means) or other basic estimates (e.g. regression coefficient) AND variation (e.g. standard deviation) or associated estimates of uncertainty (e.g. confidence intervals)
- For null hypothesis testing, the test statistic (e.g.  $F$ ,  $t$ ,  $r$ ) with confidence intervals, effect sizes, degrees of freedom and  $P$  value noted  
*Give  $P$  values as exact values whenever suitable.*
- For Bayesian analysis, information on the choice of priors and Markov chain Monte Carlo settings
- For hierarchical and complex designs, identification of the appropriate level for tests and full reporting of outcomes
- Estimates of effect sizes (e.g. Cohen's  $d$ , Pearson's  $r$ ), indicating how they were calculated

*Our web collection on [statistics for biologists](#) contains articles on many of the points above.*

### Software and code

Policy information about [availability of computer code](#)

Data collection

Data analysis

For manuscripts utilizing custom algorithms or software that are central to the research but not yet described in published literature, software must be made available to editors and reviewers. We strongly encourage code deposition in a community repository (e.g. GitHub). See the Nature Portfolio [guidelines for submitting code & software](#) for further information.

### Data

Policy information about [availability of data](#)

All manuscripts must include a [data availability statement](#). This statement should provide the following information, where applicable:

- Accession codes, unique identifiers, or web links for publicly available datasets
- A description of any restrictions on data availability
- For clinical datasets or third party data, please ensure that the statement adheres to our [policy](#)

## Field-specific reporting

Please select the one below that is the best fit for your research. If you are not sure, read the appropriate sections before making your selection.

Life sciences       Behavioural & social sciences       Ecological, evolutionary & environmental sciences

For a reference copy of the document with all sections, see [nature.com/documents/nr-reporting-summary-flat.pdf](https://www.nature.com/documents/nr-reporting-summary-flat.pdf)

## Life sciences study design

All studies must disclose on these points even when the disclosure is negative.

|                 |                                                                                                                                                                         |
|-----------------|-------------------------------------------------------------------------------------------------------------------------------------------------------------------------|
| Sample size     | The number of animals used in this study followed the standard in similar studies in rodents. We used a minimum number of animals to judge consistency across subjects. |
| Data exclusions | No data were excluded from the analysis.                                                                                                                                |
| Replication     | All results we obtained were consistent across the animals.                                                                                                             |
| Randomization   | Rats were randomly assigned in all experiments.                                                                                                                         |
| Blinding        | The results were double-blinded in all experiments. All data were analysed by at least two different researchers.                                                       |

## Reporting for specific materials, systems and methods

We require information from authors about some types of materials, experimental systems and methods used in many studies. Here, indicate whether each material, system or method listed is relevant to your study. If you are not sure if a list item applies to your research, read the appropriate section before selecting a response.

### Materials & experimental systems

### Methods

| n/a                                 | Involved in the study                                           | n/a                                 | Involved in the study                           |
|-------------------------------------|-----------------------------------------------------------------|-------------------------------------|-------------------------------------------------|
| <input type="checkbox"/>            | <input checked="" type="checkbox"/> Antibodies                  | <input checked="" type="checkbox"/> | <input type="checkbox"/> ChIP-seq               |
| <input checked="" type="checkbox"/> | <input type="checkbox"/> Eukaryotic cell lines                  | <input checked="" type="checkbox"/> | <input type="checkbox"/> Flow cytometry         |
| <input checked="" type="checkbox"/> | <input type="checkbox"/> Palaeontology and archaeology          | <input checked="" type="checkbox"/> | <input type="checkbox"/> MRI-based neuroimaging |
| <input type="checkbox"/>            | <input checked="" type="checkbox"/> Animals and other organisms |                                     |                                                 |
| <input checked="" type="checkbox"/> | <input type="checkbox"/> Human research participants            |                                     |                                                 |
| <input checked="" type="checkbox"/> | <input type="checkbox"/> Clinical data                          |                                     |                                                 |
| <input checked="" type="checkbox"/> | <input type="checkbox"/> Dual use research of concern           |                                     |                                                 |

## Antibodies

|                 |                                                                                                                                                                                                                                                                                                                                                                                                                                                                                                                                                                                                                |
|-----------------|----------------------------------------------------------------------------------------------------------------------------------------------------------------------------------------------------------------------------------------------------------------------------------------------------------------------------------------------------------------------------------------------------------------------------------------------------------------------------------------------------------------------------------------------------------------------------------------------------------------|
| Antibodies used | anti c-Fos antibody (SC-52, Santa Cruz Biotechnology, Dallas, TX, USA), anti c-Fos antibody (SC-52G, Santa Cruz Biotechnology, Dallas, TX, USA), anti oxytocin antibody (AB911, Chemicon, Temecula, CA, USA), anti vasopressin antibody (403 004, Synaptic System, Göttingen, Germany), anti tyrosine hydroxylase antibody (GTX113016, GeneTex, Irvine, CA, USA), anti tryptophan hydroxylase antibody (bs-5601R, Bioss Antibodies, Woburn, MA, USA), anti PAX2 antibody (H00005076-M01, Abnova, Taipei, Taiwan), anti corticotrophin releasing hormone antibody (T-4037, BMA BIOMEDICALS, Augst, Switzerland) |
| Validation      | All primary antibodies used in the present study have been validated in rats according to the manufacture's instruction and previous studies.                                                                                                                                                                                                                                                                                                                                                                                                                                                                  |

## Animals and other organisms

Policy information about [studies involving animals](#); [ARRIVE guidelines](#) recommended for reporting animal research

|                         |                                                                                                                                                                                                                                                                                                                        |
|-------------------------|------------------------------------------------------------------------------------------------------------------------------------------------------------------------------------------------------------------------------------------------------------------------------------------------------------------------|
| Laboratory animals      | Oxytocin-hM3Dq-mCherry heterozygous transgenic rat line was generated and bred with Wistar rats (CrLj:WI, Japan Charles River, Yokohama, Japan) . We used adult male transgenic rats weighing 250-400 g, 8-12 weeks old. The pups that had negative genotyping were used as wild type rats (in supplementary figures). |
| Wild animals            | No wild animals were used in the present study.                                                                                                                                                                                                                                                                        |
| Field-collected samples | No field collected samples were used in the present study.                                                                                                                                                                                                                                                             |
| Ethics oversight        | All experiments in this study were performed in strict accordance with guidelines on the use and care of laboratory animals as set out                                                                                                                                                                                 |

Ethics oversight

by the Physiological Society of Japan and approved by the Ethics Committee of Animal Care and Experimentation, University of Occupational and Environmental Health (approval No. AE21-006)

Note that full information on the approval of the study protocol must also be provided in the manuscript.
